# Supplementary material for: Haloperidol Metabolite II Valproate Ester (S)-(−)-MRJF22: Preliminary Studies as a Potential Multifunctional Agent Against Uveal Melanoma
Source: PubMed Central journal article supplement (PMC8474110; doi:10.1021/acs.jmedchem.1c00995), 2021-09-03
Supplement: jm1c00995_si_001.pdf [file jm1c00995_si_001.pdf]

## Supporting information

### **Haloperidol Metabolite II Valproate Ester (S)-(-)-MRJF22: Preliminary Studies as Potential Multifunctional Agent Against Uveal Melanoma**

Carla Barbaraci,<sup>†,#,§</sup> Giovanni Giurdanella,<sup>‡,§</sup> Claudia Giovanna Leotta,<sup>#</sup> Anna Longo,<sup>‡</sup> Emanuele Amata,<sup>†</sup> Maria Dichiarà,<sup>†</sup> Lorella Pasquinucci,<sup>†</sup> Rita Turnaturi,<sup>†</sup> Orazio Prezzavento,<sup>†</sup> Ivana Cacciatore,<sup>ϕ</sup> Elisa Zuccarello,<sup>ζ</sup> Gabriella Lupo,<sup>‡</sup> Giovanni Mario Pitari,<sup>\*,#</sup> Carmelina Daniela Anfuso,<sup>\*,‡</sup> Agostino Marrazzo<sup>\*,†</sup>

<sup>†</sup>Department of Drug and Health Sciences, University of Catania, Viale A. Doria 6, 95125 Catania, Italy

<sup>‡</sup>Department of Biomedical and Biotechnological Sciences, School of Medicine, University of Catania, Via S. Sofia 97, 95123 Catania, Italy

<sup>#</sup>Vera Salus Ricerca S.r.l, Via Sigmund Freud 62/B, 96100 Siracusa, Italy

<sup>ϕ</sup>Department of Pharmacy, "G. D'Annunzio" University of Chieti-Pescara, Via dei Vestini 31, 66100 Chieti Scalo, Italy

<sup>ζ</sup>Taub Institute for Research on Alzheimer's Disease and the Aging Brain, Columbia University, New York, New York 10032, United States.

#### **Corresponding Author**

\*Agostino Marrazzo: phone, (+39) 095 7834250; email, [marrazzo@unict.it](mailto:marrazzo@unict.it)

\* Carmelina Daniela Anfuso: phone: (+39) 095 4781170; email: [daniela.anfuso@unict.it](mailto:daniela.anfuso@unict.it)

\* Giovanni Mario Pitari: phone, (+39) 0931 1987360; email, [giovanni.pitari@verasalusricerca.it](mailto:giovanni.pitari@verasalusricerca.it)

---

**Table of contents**

---

|               |     |
|---------------|-----|
| Chemistry     | S3  |
| Figure S1     | S5  |
| Figure S2     | S6  |
| Figure S3     | S7  |
| Figure S4     | S8  |
| Figure S5     | S9  |
| NMR spectra   | S10 |
| HR-MS spectra | S12 |

---

## Chemistry

**General procedure for the synthesis of compounds (-)-3 and (+)-3.** A solution of 4-chloro-1-(4-fluorophenyl)butan-1-one (**2**, 1 mmol) in dry THF was added dropwise to a solution of (+) or (-)-diisopinocampheylchloroborane (DIP-Cl) in THF dry at -25 °C. The mixture was stirred at this temperature for 16 h under N<sub>2</sub>. The solvent was removed under vacuum and the residue was taken up into diethyl ether. To this solution was carefully added diethanolamine (DEA) and let stirred under N<sub>2</sub> overnight. The white salt formed was separated by filtration through Celite<sup>®</sup> and the filtrate was concentrated. The reaction mixture was quenched with a solution of HCl 1M and the aqueous phase extracted with CH<sub>2</sub>Cl<sub>2</sub> (3 x 50 mL). The organic phase was dried over anhydrous Na<sub>2</sub>SO<sub>4</sub>, filtered and evaporated. The crude product was purified by flash chromatography (1:9 EtOAc/Cy) to obtain the desired products.

**(R)-(+)-4-chloro-1-(4-fluorophenyl)butan-1-ol [(+)-3].** Compound (+)-**3** was prepared according to the general procedure using **2** (0.400 g, 2.0 mmol) and (+)-DIP-Cl (2.570 g, 8.0 mmol). Yield: 0.385 g (95%), white solid.  $[\alpha]_D^{20} = +37^\circ$  (c1.0, CHCl<sub>3</sub>). <sup>1</sup>H NMR (500 MHz, CDCl<sub>3</sub>) δ 7.42–7.28 (m, 2H), 7.07–6.99 (m, 2H), 4.70 (t, *J* = 6.0 Hz, 1H), 3.58–3.52 (m, 2H), 2.57–2.30 (m, 2H), 2.12–1.63 (m, 3H). <sup>13</sup>C NMR (500 MHz, CDCl<sub>3</sub>) δ 164.7 (*J*<sub>CF</sub> = 325.0 Hz), 141.2, 131.1 (*J*<sub>CF</sub> = 8.5 Hz), 115.7 (*J*<sub>CF</sub> = 35.0 Hz), 72.1, 44.2, 37.2, 24.3. Anal. Calcd for C<sub>10</sub>H<sub>12</sub>ClFO: C, 59.27; H, 5.97; N, 17.49. Found: C, 59.50; H, 6.07; N, 17.58.

**(S)-(-)-4-chloro-1-(4-fluorophenyl)butan-1-ol [(-)-3].** Compound (-)-**3** was prepared according to the general procedure using **2** (0.500 g, 2.0 mmol) and (-)-DIP-Cl (0.600 g, 12.0 mmol). Yield: 0.340 g (84%), white solid.  $[\alpha]_D^{20} = -41^\circ$  (c1.2, CHCl<sub>3</sub>). <sup>1</sup>H NMR (500 MHz, CDCl<sub>3</sub>) δ 7.42–7.28 (m, 2H), 7.07–6.99 (m, 2H), 4.70 (t, *J* = 6.0 Hz, 1H), 3.58–3.52 (m, 2H), 2.57–2.30 (m, 2H), 2.12–1.63 (m, 3H). <sup>13</sup>C NMR (125 MHz, CDCl<sub>3</sub>) δ 164.7 (*J*<sub>CF</sub> = 325.0 Hz), 141.2, 131.1 (*J*<sub>CF</sub> = 8.5 Hz), 115.7 (*J*<sub>CF</sub> = 35.0 Hz), 72.1, 44.2, 37.2, 24.3. Anal. Calcd for C<sub>10</sub>H<sub>12</sub>ClFO: C, 59.27; H, 5.97; N, 17.49. Found: C, 59.45; H, 6.07; N, 17.79.

**General procedure for the synthesis of compounds (+)-4 and (-)-4.** Both compounds were synthesized as reported in literature.<sup>33</sup> To a solution of 4-(4-chlorophenyl)hydroxypiperidine (4 mmol) and KHCO<sub>3</sub> (4 mmol) in dry DMF (12 mL) was added dropwise a solution (-)-3 or (+)-3 (1 mmol). The reaction mixture was heated to 80 °C for 24 h. The solvent was removed under vacuum and the residue was dissolved in CHCl<sub>3</sub> and washed with NaHCO<sub>3</sub> (3 x 25 mL). The organic layer was dried over anhydrous Na<sub>2</sub>SO<sub>4</sub>, filtered and evaporated. The crude product was purified by flash chromatography (1:9 MeOH/CH<sub>2</sub>Cl<sub>2</sub>) to obtain the desired products.

**(R)-(+)-4-(4-chlorophenyl)-1-[4(4-fluorophenyl)-4-hidroxybutyl]piperidin-4-ol [(R)-(+)-HP-mII, (+)-4].** According to general procedure, compound (+)-4 was prepared by reacting 4-(4-chlorophenyl)hydroxypiperidine (1.140 g, 5.0 mmol) and compound (+)-3 (0.362 g, 1.79 mmol). Yield 0.189 g (28%), white solid. Mp: 145-146.5 °C; of,  $[\alpha]_D^{20} = +66^\circ$  (*c*1.0, CHCl<sub>3</sub>). <sup>1</sup>H NMR (500 MHz, CDCl<sub>3</sub>) δ 7.47–7.27 (m, 6H), 7.05–6.95(m, 2H), 4.65–4.62 (m, 1H), 3.05–2.99 (m, 1H), 2.85–2,79 (m, 1H), 2,67–2,42 (m, 4H), 2.28–2.12 (m, 2H), 2.01–1.79 (m, 8H). <sup>13</sup>C NMR (125 MHz, CDCl<sub>3</sub>) δ 164.7 (*J*<sub>CF</sub> = 325.5 Hz), 145.7, 138.3, 130.4, 130.4 (*J*<sub>CF</sub> = 8.5 Hz), 120.9, 115.8 (*J*<sub>CF</sub> = 35.5 Hz), 73.0, 71.1, 55.7, 48.1, 39.6, 39.4, 24.8. Anal. Calcd for C<sub>21</sub>H<sub>25</sub>ClFNO<sub>2</sub>: C, 65.19; H, 6.77; N, 3.62. Found: C, 65.37; H, 7.02; N, 3.20.

**(S)-(-)-4-(4-chlorophenyl)-1-[4(4-fluorophenyl)-4-hidroxybutyl]piperidin-4-ol [(S)-(-)-HP-mII, (-)-4].** According to general procedure, compound (-)-4 was prepared by reacting 4-(4-chlorophenyl)hydroxypiperidine (0.865 g, 4.0 mmol) and compound (-)-3 (0.206 g, 1.0 mmol). Yield 0.291 g (77%), white solid. Mp: 145–146 °C.  $[\alpha]_D^{20} = -65^\circ$  (*c*1.0, CHCl<sub>3</sub>). <sup>1</sup>H NMR (500 MHz, CDCl<sub>3</sub>) δ 7.47–6.83 (m, 8H), 4.65–4.62 (m, 1H), 3.05–2.99 (m, 1H), 2.85–2,79 (m, 1H), 2,67–2,42 (m, 4H), 2.31–2.23 (m, 2H), 2.10–1.50 (m, 8H). <sup>13</sup>C NMR (125 MHz, CDCl<sub>3</sub>) δ 164.67 (*J*<sub>CF</sub> = 325.5 Hz), 145.7, 138.3, 130.4, 130.4 (*J*<sub>CF</sub> = 8.5 Hz), 120.9, 115.8 (*J*<sub>CF</sub> = 35.5 Hz), 73.0, 71.1, 55.7, 48.1, 39.6, 39.4, 24.8. Anal. Calcd for C<sub>21</sub>H<sub>25</sub>ClFNO<sub>2</sub>: C, 65.19; H, 6.77; N, 3.62. Found: C, 64.97; H, 6.47; N, 3.99.

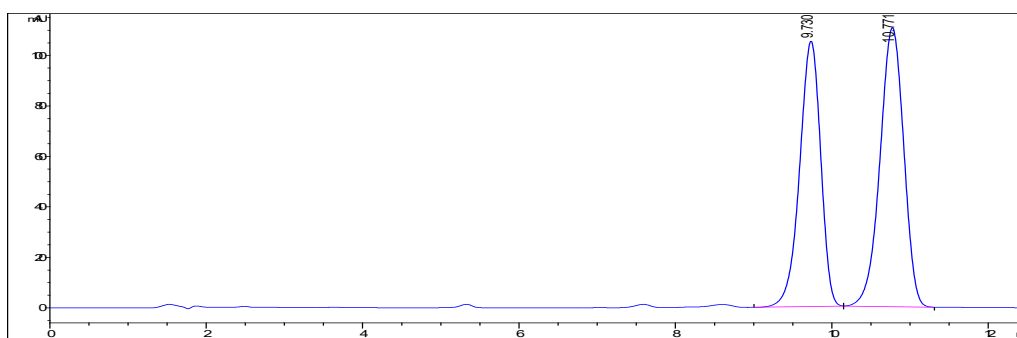

| Compound                | Retention time | Area% |
|-------------------------|----------------|-------|
| ( <i>R</i> )-(+)-MRJF22 | 9.7            | 45.7  |
| ( <i>S</i> )-(-)-MRJF22 | 10.7           | 54.3  |

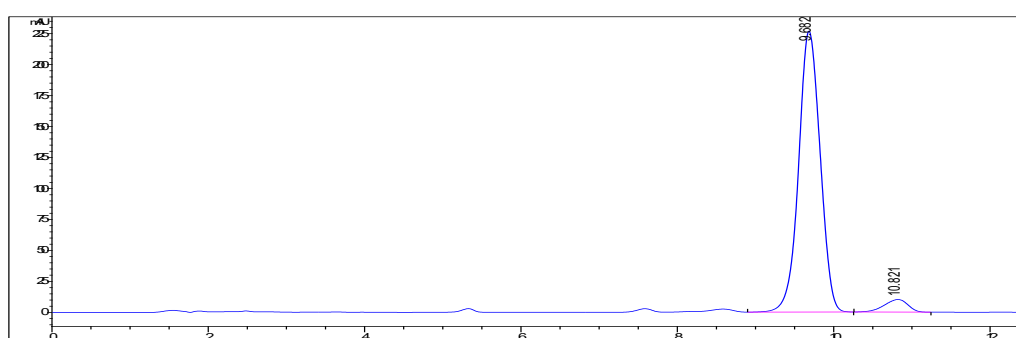

| Compound                | Retention time | Area% | ee% |
|-------------------------|----------------|-------|-----|
| ( <i>R</i> )-(+)-MRJF22 | 9.7            | 95.3  | 92  |
| ( <i>S</i> )-(-)-MRJF22 | 10.7           | 4     |     |

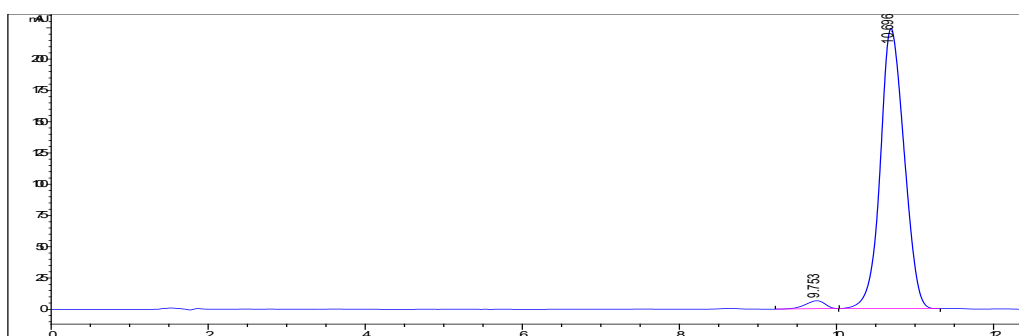

| Compound                | Retention time | Area% | ee%  |
|-------------------------|----------------|-------|------|
| ( <i>R</i> )-(+)-MRJF22 | 9.7            | 2.3   | 95.4 |
| ( <i>S</i> )-(-)-MRJF22 | 10.7           | 97.7  |      |

Figure S1. HPLC chromatograms of ( $\pm$ )-MRJF22, (*R*)-(+)-MRJF22, and (*S*)-(-)-MRJF22.

Effects of (-)-1 and (+)-1 on HREC viability at three different time points.

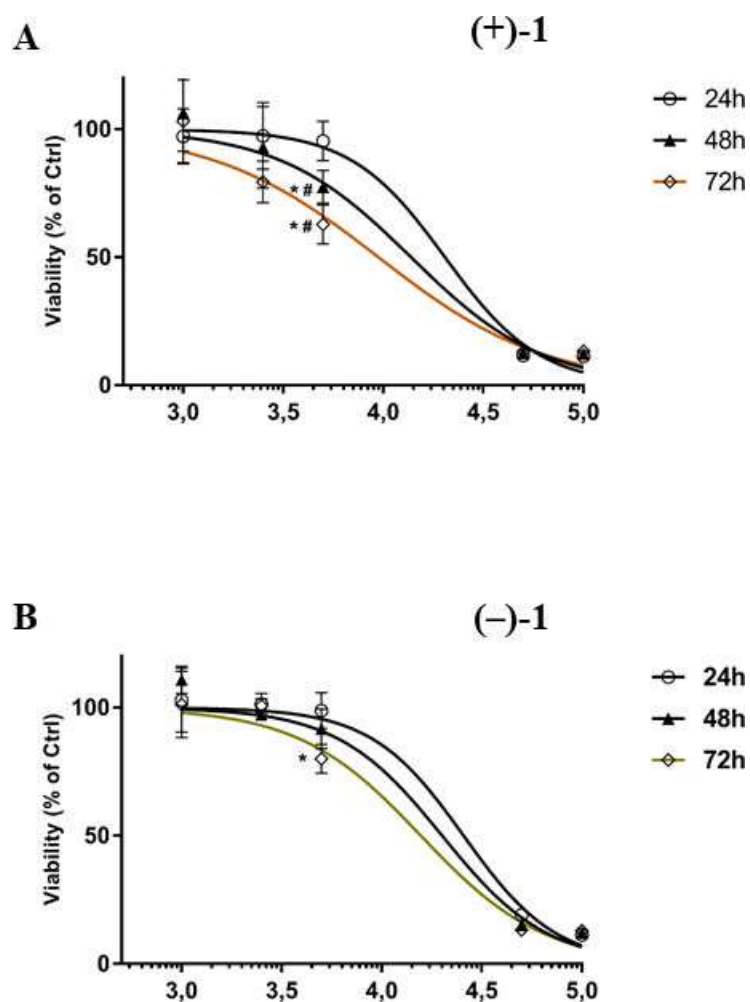

**Figure S2.** MTT values obtained in cells treated with increasing concentration (1.0, 2.5, 5.0, 10.0 and 20.0  $\mu\text{M}$ ) of (-)-1 (A) and (+)-1 (B) for 24, 48 and 72 h. Data are expressed as a mean  $\pm$  SEM of three independent experiments, each involving three different wells per condition. Statistical analysis was performed using two-way ANOVA, followed by Tukey's test. \*  $p < 0.05$  vs control; #  $p < 0.05$  vs 24 h 5  $\mu\text{M}$ .

### Wound healing assay: effects of ( $\pm$ )-1 on VEGF-A stimulated HREC

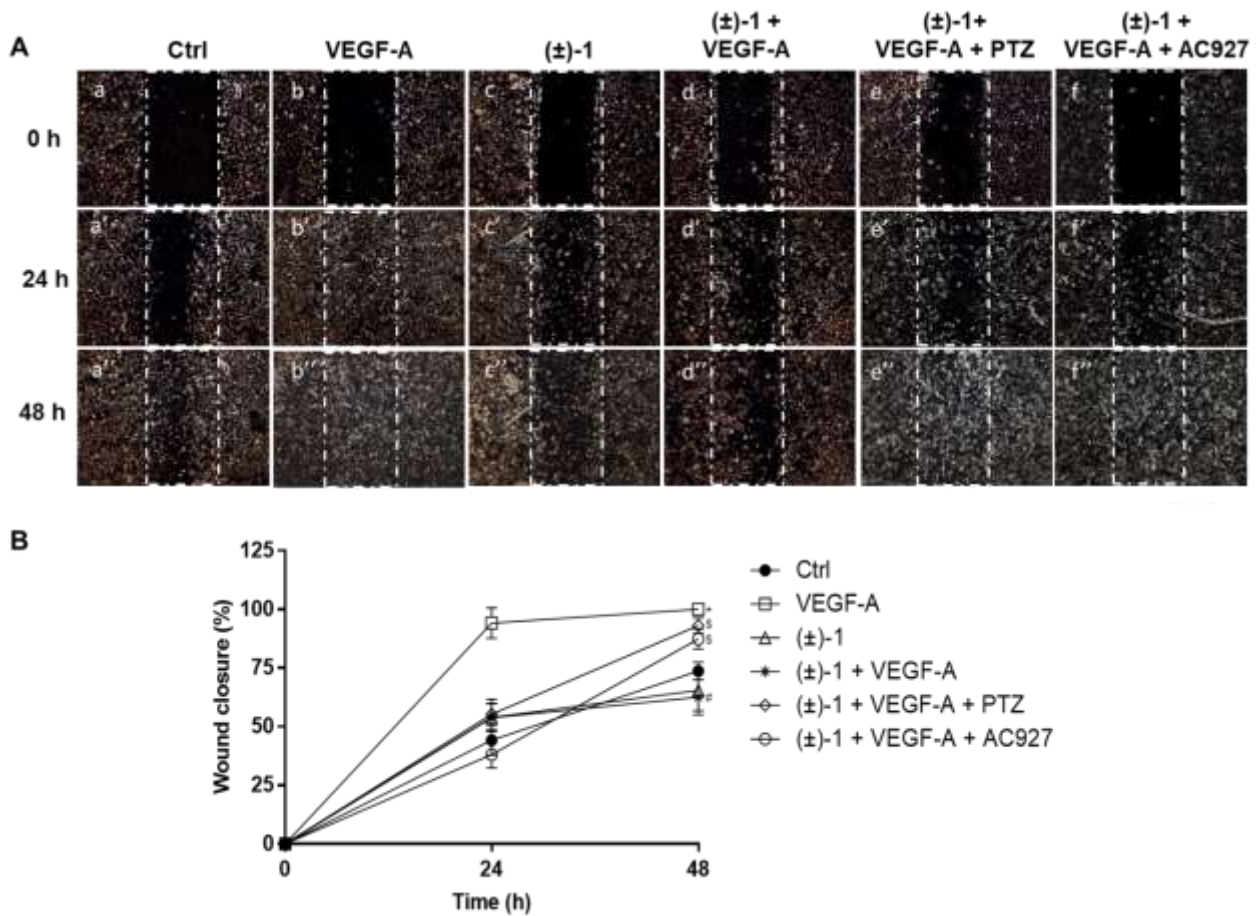

**Figure S3.** A) Representative images of scratched cells treated with VEGF-A (80 ng/mL; b, b' and b''), 5  $\mu$ M of ( $\pm$ )-1 (c, c' and c''), VEGF-A plus 5  $\mu$ M of ( $\pm$ )-1 (d, d' and d''), VEGF-A plus 5  $\mu$ M ( $\pm$ )-1 plus 2  $\mu$ M of Pentazocine (PTZ, e, e' and e''), VEGF-A plus 5  $\mu$ M of ( $\pm$ )-1 plus 2  $\mu$ M of AC927 (f, f' and f''). Untreated cells were considered as control samples (Ctrl; a, a' and a''). Images show cells at the starting points (0 h after scratch: a, b, c, d, e and f), after 24 h (a', b', c', d', e' and f') and 48 h (a'', b'', c'', d'', e'' and f'') from the starting of the assays. B) Wound closure percentage with ( $\pm$ )-1 was quantified by ImageJ software. Ctrl, vehicle control (DMSO). Values are expressed as a mean  $\pm$  SEM of three independent experiments, each involving three different wells per condition. Statistical analysis was performed using one-way ANOVA, followed by Tukey's test. \* $p$  < 0.05 vs Ctrl; # $p$  < 0.05 vs VEGF-A; § $p$  < 0.05 vs the same conditions without agonist or antagonist.

## Wound healing assay: effects of (+)-1 on VEGF-A stimulated HREC

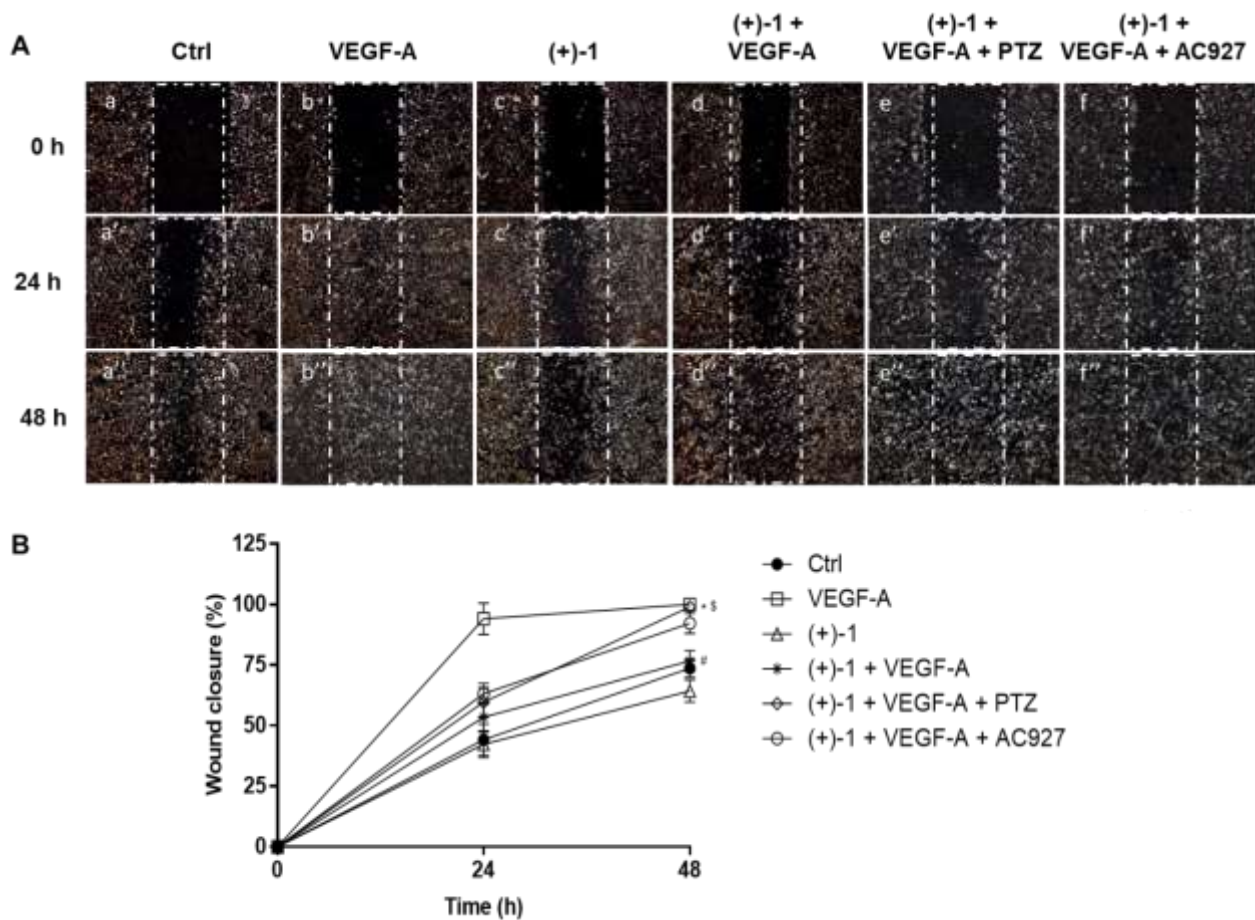

**Figure S4.** A) Representative images of scratched cells treated with VEGF-A (80 ng/mL; b, b' and b''), 5  $\mu$ M of (+)-1 (c, c' and c''), VEGF-A plus 5  $\mu$ M of (+)-1 (d, d' and d''), VEGF-A plus 5  $\mu$ M (+)-1 plus 2  $\mu$ M of PTZ (e, e' and e''), VEGF-A plus 5  $\mu$ M of (+)-1 plus 2  $\mu$ M of AC927 (f, f' and f''). Untreated cells were considered as control samples (Ctrl; a, a' and a''). Images show cells at the starting points (0 h after scratch: a, b, c, d, e and f), after 24 h (a', b', c', d', e' and f') and 48 h (a'', b'', c'', d'', e'' and f'') from the starting of the assays. B) Wound closure percentage with (+)-1 was quantified by ImageJ software. Ctrl, vehicle control (DMSO). Values are expressed as a mean  $\pm$  SEM of three independent experiments, each involving three different wells per condition. Statistical analysis was performed using one-way ANOVA, followed by Tukey's test. \* $p$  < 0.05 vs Ctrl; # $p$  < 0.05 vs VEGF-A; § $p$  < 0.05 vs the same conditions without agonist or antagonist.



**Wound healing assay: effects of (-)-1 on VEGF-A stimulated HREC.**

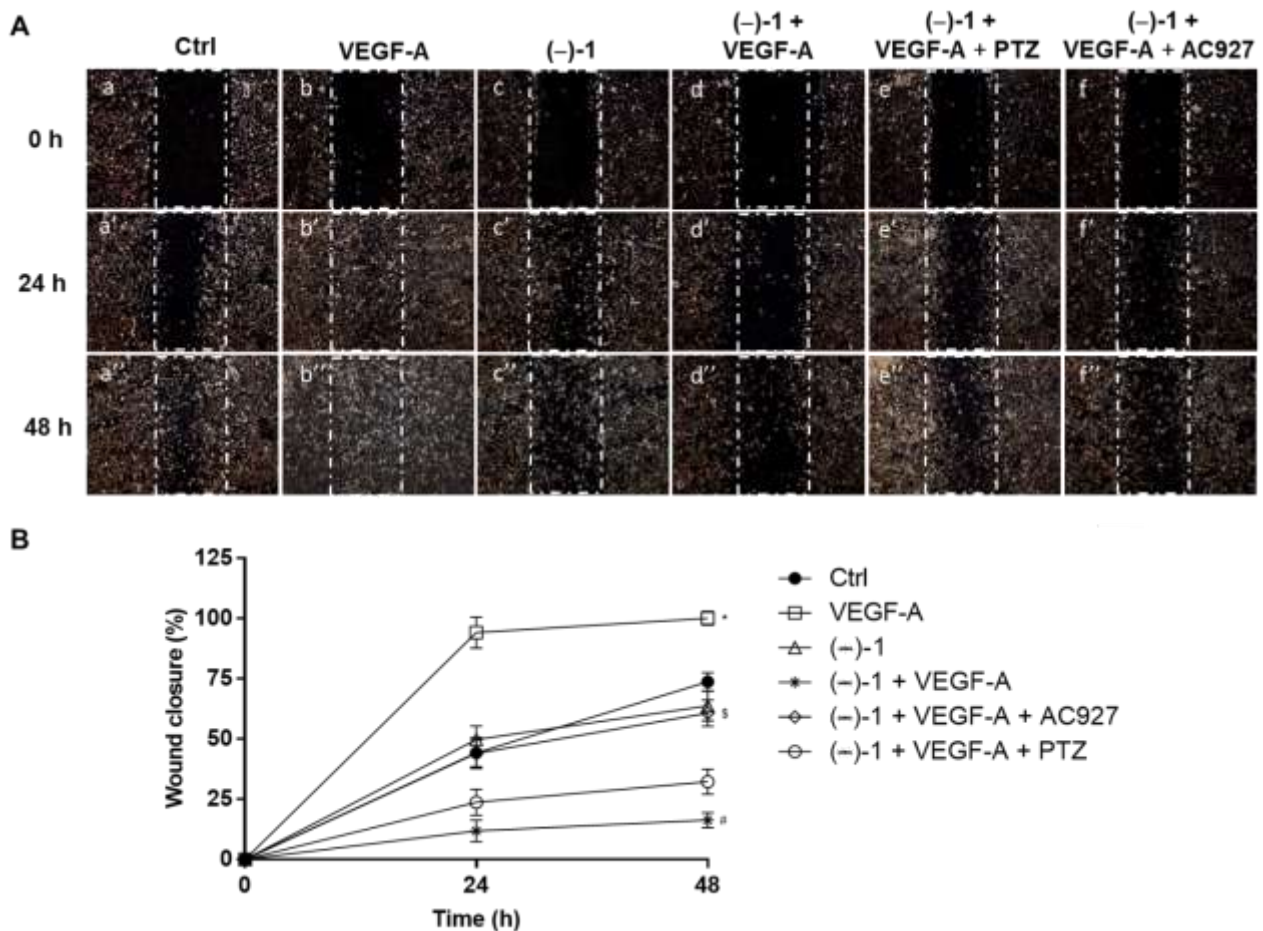

**Figure S5.** A) Representative images of scratched cells treated with VEGF-A (80 ng/mL; b, b' and b''), 5  $\mu$ M of (-)-1 (c, c' and c''), VEGF-A plus 5  $\mu$ M of (-)-1 (d, d' and d''), VEGF-A plus 5  $\mu$ M (-)-1 plus 2  $\mu$ M of PTZ (e, e' and e''), VEGF-A plus 5  $\mu$ M of (-)-1 plus 2  $\mu$ M of AC927 (f, f' and f''). Untreated cells were considered as control samples (Ctrl; a, a' and a''). Images show cells at the starting points (0 h after scratch: a, b, c, d, e and f), after 24 h (a', b', c', d', e' and f') and 48 h (a'', b'', c'', d'', e'' and f'') from the starting of the assays. B) Wound closure percentage with (-)-1 was quantified by ImageJ software. Ctrl, vehicle control (DMSO). Values are expressed as a mean  $\pm$  SEM of three independent experiments, each involving three different wells per condition. Statistical analysis was performed using one-way ANOVA, followed by Tukey's test. \* $p$  < 0.05 vs Ctrl; # $p$  < 0.05 vs VEGF-A; § $p$  < 0.05 vs the same conditions without agonist or antagonist.

# NMR spectra

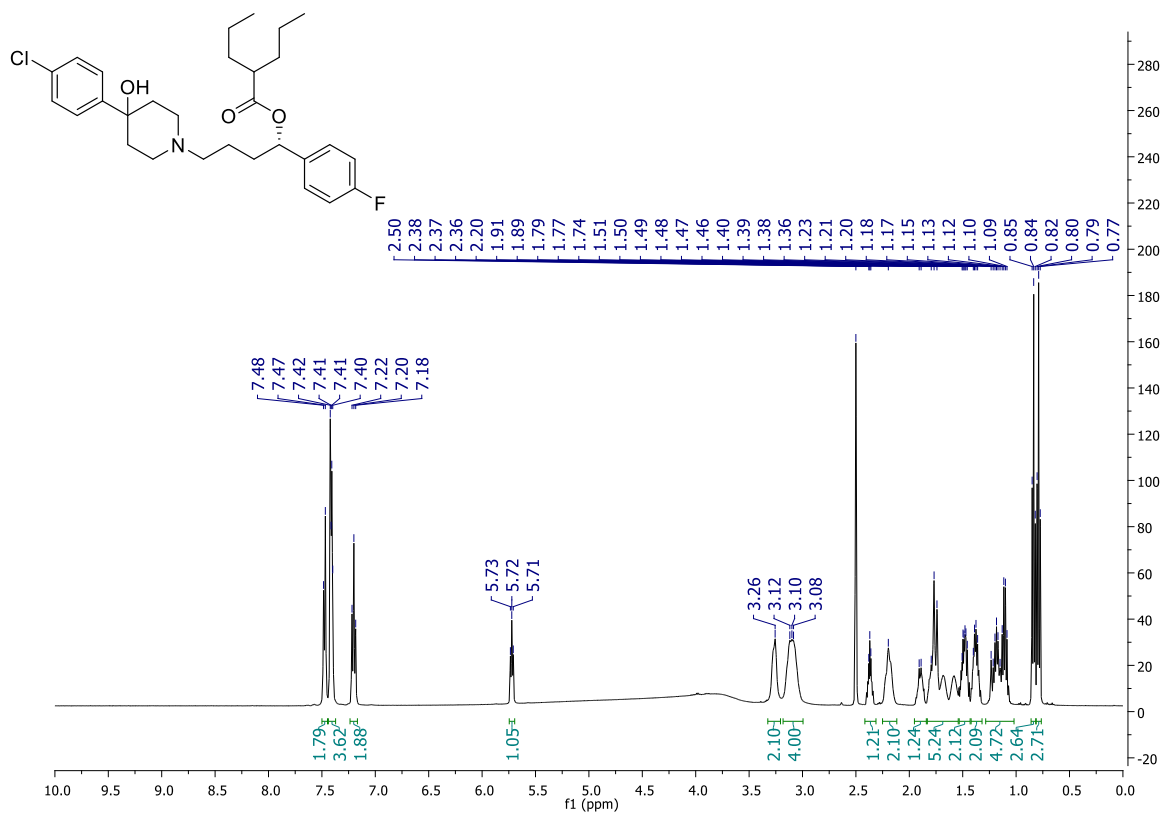

<sup>1</sup>H (500 MHz, DMSO-*d*<sub>6</sub>) of (R)-(+)-MRJF22(oxalate), [(+)-1].

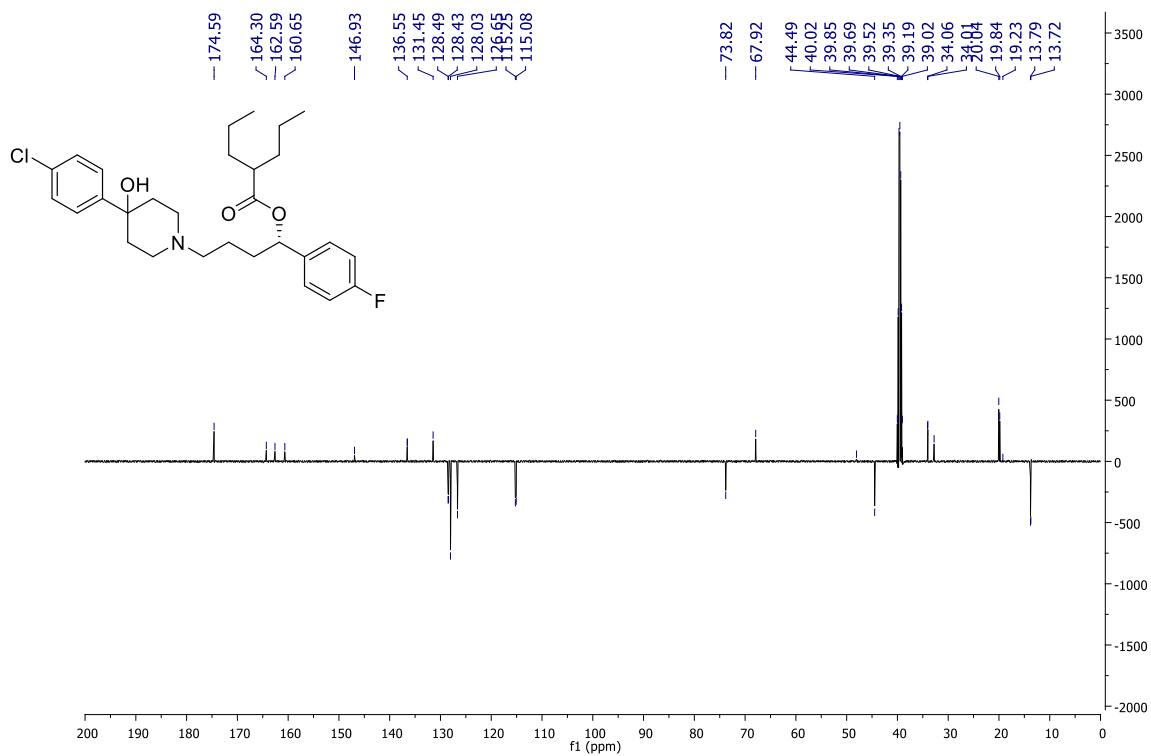

<sup>13</sup>C NMR (125 MHz, DMSO-*d*<sub>6</sub>) of (R)-(+)-MRJF22(oxalate), [(+)-1].

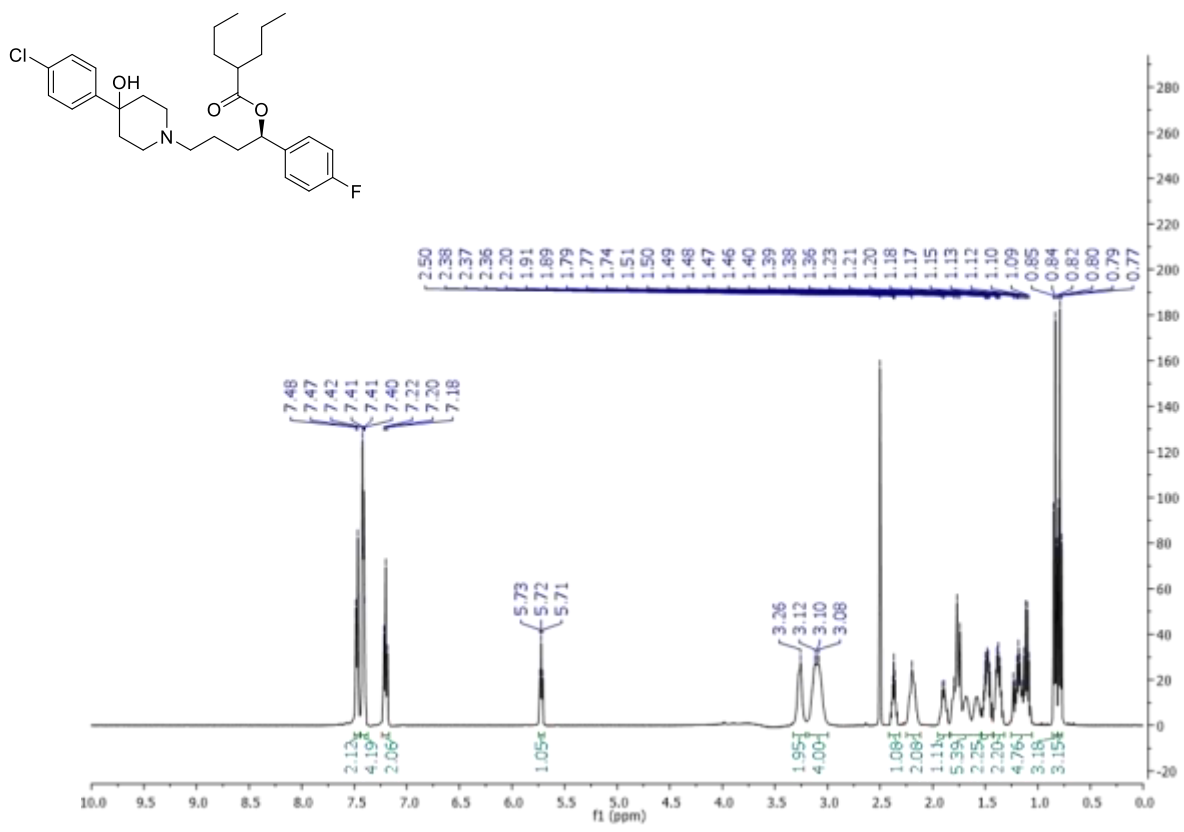

<sup>1</sup>H (500 MHz, DMSO-*d*<sub>6</sub>) of (S)-(-)-MRJF22(oxalate), [(-)-1].

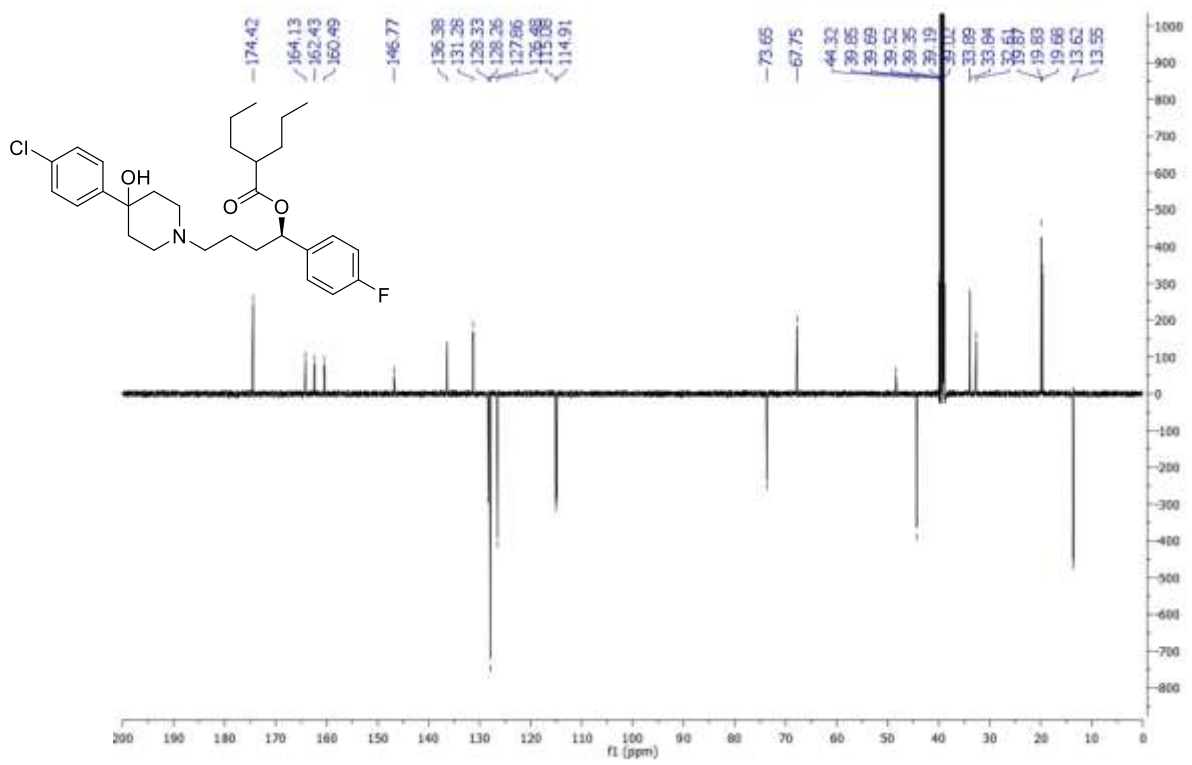

<sup>13</sup>C NMR (125 MHz, DMSO-*d*<sub>6</sub>) of (S)-(-)-MRJF22(oxalate), [(-)-1].

## HR-MS spectra

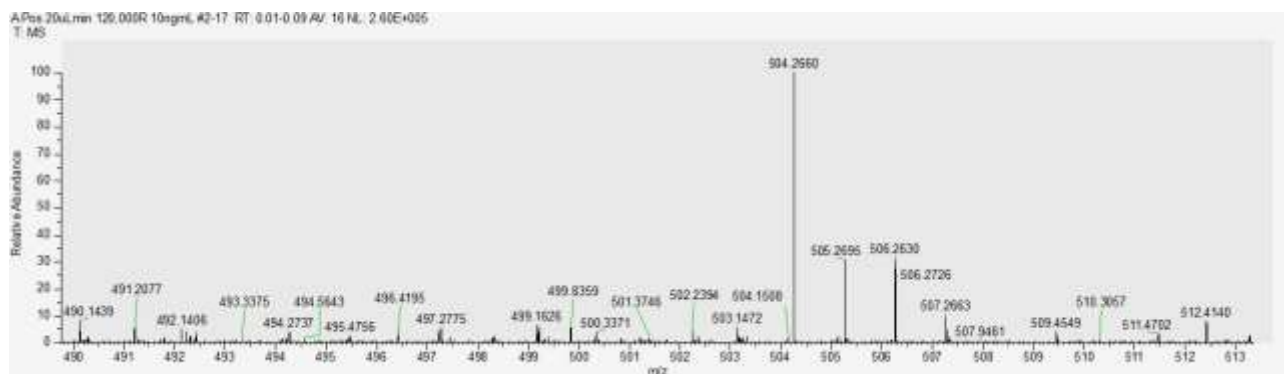

HR-MS SPECTRA of (±)-MRJF22.

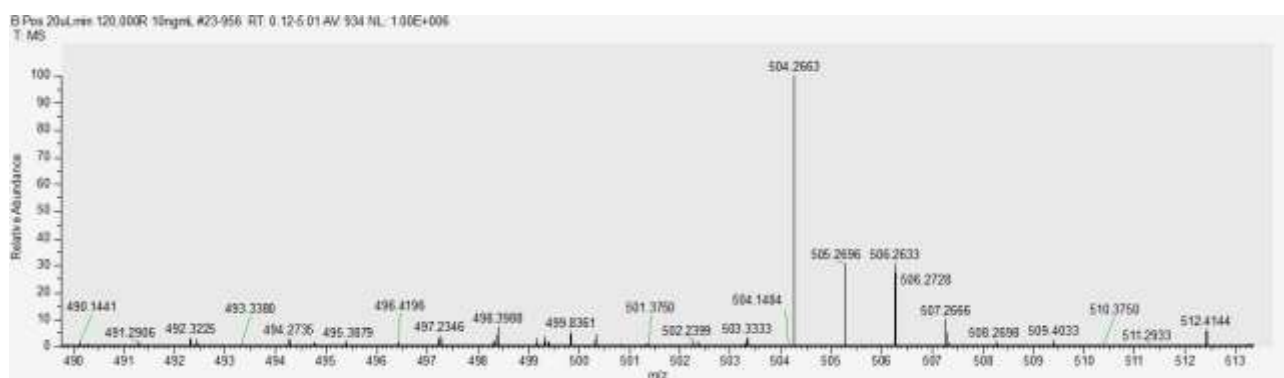

HR-MS SPECTRA of (R)-(+)-MRJF22 [(+)-1].

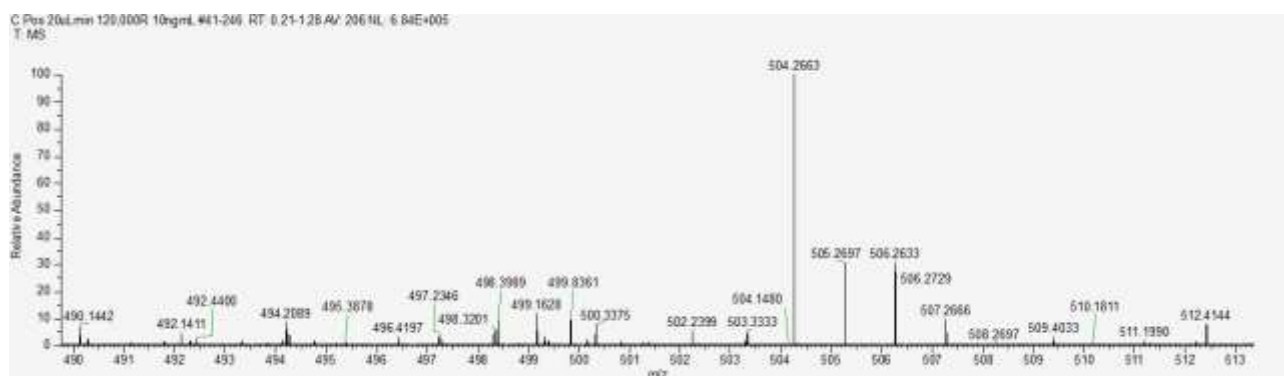

HR-MS SPECTRA of (S)-(+)-MRJF22 [(-)-1].
